# Supplementary figures and images for: Stage 1 of the meaningful use incentive program for electronic health records: a study of readiness for change in ambulatory practice settings in one integrated delivery system
Source: Springer Nature journal article supplement (doi:10.1186/s12911-014-0119-1), 2014-12-01

Hypothesized Predictors of Readiness

Components of Readiness

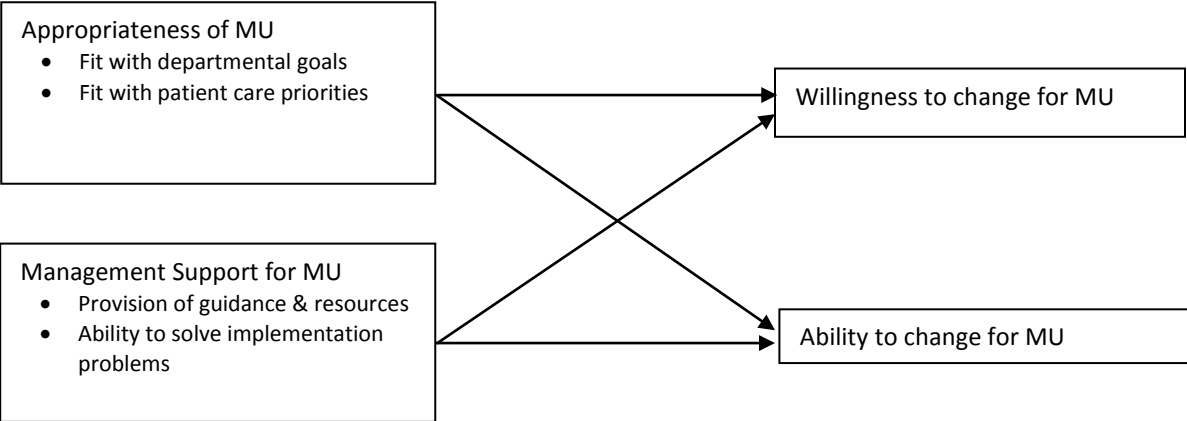

Supplement: MOESM1 [file 9756226]
